# Supplementary material for: Microbial Water Quality through a Full-Scale Advanced Wastewater Treatment Demonstration Facility
Source: PubMed Central journal article supplement (PMC9745798; doi:10.1021/acsestengg.2c00198), 2022-10-06
Supplement: ee2c00198_si_001.pdf [file ee2c00198_si_001.pdf]

1 Title: Microbial water quality through a full-scale advanced wastewater treatment demonstration  
2 facility

3  
4 Authors: Scott Miller<sup>1,2</sup>, Hannah Greenwald<sup>1,2</sup>, Lauren C. Kennedy<sup>1,2,3</sup>, Rose S. Kantor<sup>1,2</sup>, Renjing  
5 Jiang<sup>1,2</sup>, Aleksey Pisarenko<sup>4</sup>, Elise Chen<sup>4</sup>, and Kara L. Nelson\*<sup>1,2</sup>

6  
7 <sup>1</sup>Department of Civil and Environmental Engineering, College of Engineering, University of  
8 California, Berkeley; Berkeley, CA, 94720, United States

9 <sup>2</sup>National Science Foundation Engineering Research Center for Re-inventing the Nation’s Urban  
10 Water Infrastructure (ReNUWIt); Berkeley, CA, 94720, United States

11 <sup>3</sup>Department of Civil and Environmental Engineering, College of Engineering, Stanford  
12 University, Stanford, CA, 94305, United States

13 <sup>4</sup>Trussell Technologies, Inc.; Solana Beach, CA, 92075, United States

14  
15 \*Corresponding author email: karanelson@berkeley.edu

16 **Table of Contents**

17 **1. SUPPLEMENTARY METHODS .....2**

18 1.1. CALCULATION OF RECOVERY EFFICIENCIES BY PRIMARY AND SECONDARY CONCENTRATION.....2

19 1.2. ADDITIONAL QUANTITATIVE PCR METHODS.....2

20 **2. SUPPLEMENTARY TABLES .....3**

21 **3. SUPPLEMENTARY FIGURES .....14**

22 **4. AUTHOR CONTRIBUTIONS .....18**

23 **5. REFERENCES .....19**

24  
25  
26

## 27 1. Supplementary Methods

28

### 29 1.1. Calculation of Recovery Efficiencies by Primary and Secondary Concentration

30 Recovery efficiencies for primary (dead-end ultrafiltration) and secondary concentration (PEG  
31 flocculation and centrifugation) were calculated as follows:

32

$$33 \quad \text{Primary Recovery Efficiency} = \frac{TCC_{\text{Backflush}} * V_{\text{Backflush}}}{TCC_{\text{Grab Sample}} * V_{\text{Ultrafilter Feed}}}$$

34

$$35 \quad \text{Secondary Recovery Efficiency} = \frac{TCC_{\text{Resuspended Floc}} * V_{\text{Floc Volume}}}{TCC_{\text{Backflush}} * V_{\text{Backflush}}}$$

36

37 Where:

38

- $TCC_{\text{Backflush}}$  = total cell counts in ultrafilter backflush water
- $V_{\text{Backflush}}$  = volume of the ultrafilter backflush water
- $TCC_{\text{Grab sample}}$  = total cell counts in the raw grab sample
- $V_{\text{Ultrafilter feed}}$  = volume of water filtered by the ultrafilter
- $TCC_{\text{Resuspended floc}}$  = total cell counts in the resuspended RO permeate floc
- $V_{\text{Floc volume}}$  = volume of the resuspended RO permeate floc

44

### 45 1.2. Additional Quantitative PCR Methods

46 For qPCR inhibition analysis, we used undiluted samples with less than 100 ng of DNA per  
47 qPCR assay well. Results of inhibition testing indicated that samples with less than 100 ng of  
48 DNA per qPCR assay well were uninhibited; therefore, sample DNA were diluted to ensure less  
49 than 100 ng of DNA was added to each qPCR well. Dilution of sample DNA into qPCR wells  
50 varied from no dilution to 100-fold dilution. Of the 242 samples analyzed among all of the qPCR  
51 assays, one sample was diluted 100-fold, four samples were diluted 20-fold, and 16 samples  
52 were diluted 10-fold; all other samples were diluted 5-fold or less.

53

54 On the StepOnePlus software, we applied the same threshold to all samples within an assay. The  
55 threshold was selected based on average threshold values determined by the instrument and  
56 checked visually to best cross the linear portions of every standard and sample amplification  
57 curve. **Table S2** shows the thresholds chosen for each assay.

58

59 For all samples with mean gene counts above their respective assay LOD, all three replicates  
60 amplified above the respective LOD. No sample data were removed from data analysis.

61

62 gBlock<sup>TM</sup> standards were prepared as follows: probes were prepared as 100 nm PrimeTime 5' 6-  
63 FAM/ZEN/3' IBFQ (16S rRNA) or PrimeTime Eco 5' 6-FAM/ZEN/3' IBFQ (adenovirus and  
64 polyomavirus) purified by HPLC. Primers for all assays were prepared as gBlocks<sup>TM</sup> Gene  
65 Fragments, RxnReady<sup>®</sup> Primer Pool – Oligo Mix Products purified by standard desalting.

66

67 **2. Supplementary Tables**

68

69 **Table S1: Sample dates and times for dead-end ultrafiltration (for DNA and qPCR analysis),**  
 70 **and grab samples for flow cytometry and ATP.** Times are shown in 24-hour format. Dead-end  
 71 ultrafiltration sampling for RO permeate was conducted overnight to maximize quantity of water  
 72 filtered due to low microbial quantities in RO permeate.

| Date               | Type of Sample           | Tertiary           | Ozone | BAC                | MF/UF  | MF/UF Storage Tank | RO                             | AOP   |
|--------------------|--------------------------|--------------------|-------|--------------------|--------|--------------------|--------------------------------|-------|
| September 17, 2017 | Dead-end Ultrafiltration | 10:15-10:37        |       | 9:10-10:54         |        |                    | 9:00-11:00 (overnight)         |       |
|                    | Grab                     | 10:38              | 9:29  | 10:55              | 9:50   | 9:50               | 10:50                          | 10:25 |
| September 21, 2017 | Dead-end Ultrafiltration |                    |       |                    |        |                    | 15:30-11:55 (overnight)        |       |
|                    | Grab                     |                    |       |                    |        |                    | 15:30                          |       |
| September 26, 2017 | Dead-end Ultrafiltration | 14:20-time unknown |       | 14:00-time unknown |        |                    | 14:00-11:15 (overnight)        |       |
|                    | Grab                     | 14:20              | 14:00 | 14:00              | 13:30  | 13:15              | 14:00                          | 14:15 |
| October 10, 2017   | Dead-end Ultrafiltration | 15:30-time unknown |       | 15:14-time unknown |        | 16:45-time unknown | 17:00-time unknown (overnight) |       |
|                    | Grab                     | 15:24              | 16:10 | 15:14              | 16:45  | 16:45              | 17:00                          | 16:30 |
| November 7, 2017   | Dead-end Ultrafiltration |                    |       |                    |        |                    |                                |       |
|                    | Grab                     | 9:45               | 9:45  | 9:45               | 10:00* | 9:50               | 10:05                          | 10:00 |
| November 14, 2017  | Dead-end Ultrafiltration | 11:15-11:35        |       | 10:50-12:30        |        | 11:35-13:25        | 11:30-time unknown (overnight) |       |
|                    | Grab                     | 11:15              | 11:55 | 10:50              | 11:35  | 11:05              | 11:30                          | 11:30 |
| December 14, 2017  | Dead-end Ultrafiltration | 14:30-14:55        |       | 14:00-15:25        |        | 14:25-16:45        | 15:30-time unknown (overnight) |       |
|                    | Grab                     | 14:30              | 15:25 | 14:00              | 15:05  | 14:25              | 15:30                          | 15:35 |
| TOTAL              | Ultrafiltration          | 5                  | 0     | 5                  | 0      | 3                  | 6                              | 0     |
|                    | Grab                     | 6                  | 6     | 6                  | 6      | 6                  | 7                              | 6     |

73

74

75

76 **Table S2: Summary table of gBlocks™ standards.** Note that additional qPCR targets used in  
 77 unrelated research studies are included on the gBlocks and are included here to inform  
 78 characteristics (e.g., length) of each standard.

|                                            | Standard A                                                      | Standard B                                           | Standard C   |
|--------------------------------------------|-----------------------------------------------------------------|------------------------------------------------------|--------------|
| Includes F and R Primers for what Targets? | 16S rRNA Gene, Legionella pneumophila, Adenovirus, Polyomavirus | Acanthamoeba spp., Vermamoeba vermiformis, sul1, MAC | amoA, blatem |
| Length                                     | 740                                                             | 997                                                  | 748          |
| Melting temp (degrees Celsius)             | 80.6                                                            | 80.4                                                 | 78.1         |
| GC Content                                 | 0.5243                                                          | 0.5145                                               | 0.4626       |
| Pass IDT complexity screening?             | yes                                                             | yes                                                  | yes          |
| Primer sequences in standard verified?     | yes                                                             | yes                                                  | yes          |

79  
 80  
 81 **Table S3: Summary statistics for qPCR standard curves, including amplification efficiency, R<sup>2</sup>, and number of replicates amplifying at low end of curve.**  
 82

|                                                                                                                           | 16S rRNA Gene                     | Human Adenovirus                  | <i>bla</i> <sub>TEM</sub>         | JC Polyomavirus                   | <i>sul1</i>                       |
|---------------------------------------------------------------------------------------------------------------------------|-----------------------------------|-----------------------------------|-----------------------------------|-----------------------------------|-----------------------------------|
| # of Standard Curves Run =                                                                                                | 10                                | 3                                 | 7                                 | 2                                 | 6                                 |
| Threshold applied                                                                                                         | 0.14                              | 0.08                              | 0.4                               | 0.14                              | 0.4                               |
| Linear range (gene copies per qPCR well)                                                                                  | 10 <sup>3</sup> - 10 <sup>9</sup> | 10 <sup>1</sup> - 10 <sup>7</sup> | 10 <sup>1</sup> - 10 <sup>6</sup> | 10 <sup>1</sup> - 10 <sup>7</sup> | 10 <sup>1</sup> - 10 <sup>6</sup> |
| <b>Amplification Efficiency</b>                                                                                           |                                   |                                   |                                   |                                   |                                   |
| Arithmetic mean                                                                                                           | 84.4                              | 87.1                              | 81.2                              | 93.0                              | 83.8                              |
| Standard deviation                                                                                                        | 7.0                               | 8.1                               | 3.9                               | 1.8                               | 6.6                               |
| Maximum                                                                                                                   | 93.6                              | 94.7                              | 87.7                              | 94.2                              | 92.7                              |
| Minimum                                                                                                                   | 73.3                              | 78.6                              | 77.3                              | 91.8                              | 73.9                              |
| <b>R<sup>2</sup> Values</b>                                                                                               |                                   |                                   |                                   |                                   |                                   |
| Mean                                                                                                                      | 0.996                             | 0.998                             | 0.998                             | 0.999                             | 0.998                             |
| St. Dev.                                                                                                                  | 0.004                             | 0.000                             | 0.001                             | 0.001                             | 0.001                             |
| <b># of Replicates Amplifying &gt;LoD at Low End of Curve (i.e., 1000 copies for 16S, 10 copies for all other assays)</b> |                                   |                                   |                                   |                                   |                                   |
| Arithmetic mean                                                                                                           | 3                                 | 2.3                               | 2.4                               | 3                                 | 2.7                               |
| Minimum                                                                                                                   | 3                                 | 2                                 | 2                                 | 3                                 | 2                                 |
| Maximum                                                                                                                   | 3                                 | 3                                 | 3                                 | 3                                 | 3                                 |
| % of All Replicates that Amplified                                                                                        | 100                               | 78                                | 81                                | 100                               | 89                                |

83  
 84  
 85

86 **Table S4: List of all qPCR standard curve results.** Each plate had one standard curve run on it  
 87 with three replicates at each 10-fold dilution step of the standard curve. None of the qPCR negative  
 88 controls for 16S rRNA gene amplified within the linear range of the standard curve. \*LoD = limit  
 89 of detection as defined in the main manuscript methods. \*\*qPCR negative controls were nuclease  
 90 free water as defined in the methods. \*\*\*Standard was accidentally not added to the 1000 gene  
 91 copy wells (the LoD) for the 16S rRNA gene standard curve on 3/9/19.

| Plate # | Date Run | Assay         | Effic-ency | Slope  | Y-intercept | R <sup>2</sup> | Number of Standard Curve Replicates that Amplified at the LoD* | Number of qPCR Negative Control** Replicates that Amplified | Avg C <sub>q</sub> at LoD | Standard Deviation of C <sub>q</sub> at LoD |
|---------|----------|---------------|------------|--------|-------------|----------------|----------------------------------------------------------------|-------------------------------------------------------------|---------------------------|---------------------------------------------|
| 105     | 2/9/19   | blatem        | 87.65      | -3.658 | 40.425      | 0.999          | 3                                                              | 0                                                           | 36.78                     | 0.25                                        |
| 106     | 2/18/19  | sul1          | 92.65      | -3.511 | 40.214      | 0.998          | 3                                                              | 0                                                           | 36.75                     | 0.57                                        |
| 107     | 2/18/19  | 16S           | 91.05      | -3.557 | 41.728      | 0.999          | 3                                                              | 3                                                           | 31.22                     | 0.06                                        |
| 108     | 2/18/19  | 16S           | 84.9       | -3.746 | 42.534      | 0.998          | 3                                                              | 3                                                           | 31.3                      | 0.26                                        |
| 113     | 2/21/19  | sul1          | 87.13      | -3.674 | 40.727      | 0.998          | 3                                                              | 0                                                           | 37.33                     | 0.68                                        |
| 114     | 2/21/19  | blatem        | 77.36      | -4.018 | 42.848      | 0.998          | 2                                                              | 0                                                           | 38.39                     | 0.46                                        |
| 115     | 2/24/19  | 16S           | 88.33      | -3.637 | 41.518      | 0.998          | 3                                                              | 3                                                           | 30.69                     | 0.08                                        |
| 120     | 2/26/19  | sul1          | 82.47      | -3.829 | 42.021      | 1              | 2                                                              | 0                                                           | 37.96                     | 0.10                                        |
| 121     | 2/26/19  | blatem        | 79.6       | -3.932 | 42.741      | 0.998          | 2                                                              | 0                                                           | 38.32                     | 0.74                                        |
| 122     | 2/26/19  | 16S           | 78.48      | -3.975 | 44.065      | 0.996          | 3                                                              | 3                                                           | 32.85                     | 0.16                                        |
| 125     | 2/27/19  | sul1          | 77.06      | -4.03  | 42.920      | 0.998          | 2                                                              | 0                                                           | 39.17                     | 1.18                                        |
| 126     | 3/5/19   | blatem        | 80.49      | -3.899 | 42.048      | 0.996          | 3                                                              | 0                                                           | 37.94                     | 1.04                                        |
| 129     | 3/9/19   | 16S           | 78         | -3.994 | 44.807      | 0.992          | 3                                                              | 3                                                           | ***                       | ***                                         |
| 130     | 3/7/19   | sul1          | 88.49      | -3.632 | 39.872      | 0.999          | 3                                                              | 0                                                           | 36.05                     | 0.22                                        |
| 131     | 3/7/19   | blatem        | 80.8       | -3.889 | 41.534      | 0.997          | 3                                                              | 0                                                           | 38.12                     | 0.67                                        |
| 137     | 3/20/19  | 16S           | 77.72      | -3.979 | 45.240      | 0.994          | 3                                                              | 3                                                           | 33.74                     | 0.06                                        |
| 138     | 3/12/19  | blatem        | 85.198     | -3.736 | 41.700      | 0.997          | 2                                                              | 0                                                           | 37.44                     | 0.35                                        |
| 139     | 3/19/19  | sul1          | 85.034     | -3.742 | 40.899      | 0.997          | 3                                                              | 0                                                           | 37.44                     | 0.97                                        |
| 140     | 3/19/19  | 16S           | 93.555     | -3.487 | 41.638      | 0.997          | 3                                                              | 3                                                           | 31.38                     | 0.09                                        |
| 141     | 3/9/19   | adeno-virus   | 94.682     | -3.456 | 37.822      | 0.998          | 3                                                              | 0                                                           | 35.14                     | 0.08                                        |
| 142     | 3/9/19   | polyoma-virus | 91.75      | -3.537 | 41.196      | 0.998          | 3                                                              | 0                                                           | 37.37                     | 0.91                                        |
| 143     | 3/27/19  | sul1          | 73.885     | -4.162 | 44.013      | 0.999          | 1                                                              | 0                                                           | 39.88                     | NA                                          |
| 144     | 3/26/19  | blatem        | 77.3       | -4.02  | 43.184      | 0.998          | 2                                                              | 0                                                           | 39.16                     | 1.33                                        |
| 145     | 3/27/19  | 16S           | 90.623     | -3.569 | 43.611      | 0.987          | 3                                                              | 3                                                           | 33.17                     | 0.41                                        |
| 146     | 3/26/19  | adeno-virus   | 88.09      | -3.656 | 39.594      | 0.998          | 2                                                              | 0                                                           | 36.02                     | 0.86                                        |
| 147     | 3/28/19  | polyoma-virus | 94.234     | -3.468 | 40.680      | 0.999          | 3                                                              | 0                                                           | 37.21                     | 0.76                                        |
| 148     | 3/28/19  | 16S           | 73.276     | -4.189 | 51.799      | 0.996          | 3                                                              | 3                                                           | 39.21                     | 0.63                                        |
| 149     | 4/17/19  | adeno-virus   | 78.6       | -3.97  | 40.898      | 0.998          | 2                                                              | 0                                                           | 36.7                      | 0.63                                        |
| 151     | 7/1/19   | 16S           | 87.648     | -3.658 | 42.556      | 1              | 3                                                              | 3                                                           | 31.68                     | 0.08                                        |

Table S5: Reaction mixes and thermal cycling conditions for qPCR assays.

| Gene Target                          | Reference Study               | Reaction Mix                                   | Reaction Conc. ( $\mu\text{M}$ ) | Reaction Cycling                                              | Temp ( $^{\circ}\text{C}$ ) | Time (sec) |
|--------------------------------------|-------------------------------|------------------------------------------------|----------------------------------|---------------------------------------------------------------|-----------------------------|------------|
| <b>16S universal rRNA gene</b>       | Silkie <i>et al.</i> 2009     | TaqMan <sup>TM</sup> Environmental 2.0         | (1x)                             | Pre-denaturation for 95C for 10 min                           |                             |            |
|                                      |                               | Primer (F and R)                               | 0.9                              | Denaturation                                                  | 95                          | 15 s       |
|                                      |                               | Probe                                          | 0.25                             | Annealing                                                     | 60                          | 30 s       |
|                                      |                               | Bovine serum albumen                           | 0.05                             | Extension                                                     | 72                          | 60 s       |
| <b>Human adenovirus (hexon gene)</b> | Jothikumar <i>et al.</i> 2005 | TaqMan <sup>TM</sup> Environmental 2.0         | (1x)                             | Pre-denaturation for 95C for 10 min                           |                             |            |
|                                      |                               | Primer (F and R)                               | 0.9                              | Denaturation                                                  | 95                          | 15 s       |
|                                      |                               | Probe                                          | 0.3                              | Annealing                                                     | 55                          | 30 s       |
|                                      |                               | Bovine serum albumen                           | 0.05                             | Extension                                                     | 72                          | 60 s       |
| <b>JC polyomavirus</b>               | Pal <i>et al.</i> 2006        | TaqMan <sup>TM</sup> Environmental 2.0         | (1x)                             | Pre-denaturation for 95C for 10 min                           |                             |            |
|                                      |                               | Primer (F and R)                               | 0.9                              | Denaturation                                                  | 95                          | 15 s       |
|                                      |                               | Probe                                          | 0.25                             | Annealing                                                     | 53                          | 30 s       |
|                                      |                               | Bovine serum albumen                           | 0.05                             | Extension                                                     | 72                          | 60 s       |
| <b><i>bla</i>TEM</b>                 | Proia <i>et al.</i> 2018      | PowerUp <sup>TM</sup> SYBR <sup>TM</sup> Green | (1x)                             | UDG activation for 2 min + Pre-denaturation for 95C for 3 min |                             |            |
|                                      |                               | Primer (F and R)                               | 0.3                              | Denaturation                                                  | 95                          | 15 s       |
|                                      |                               | Probe                                          | NA                               | Annealing                                                     | 60                          | 20 s       |
|                                      |                               | Bovine serum albumen                           | 0.05                             | Extension                                                     | 72                          | 60 s       |
| <b><i>sul1</i></b>                   | Proia <i>et al.</i> 2018      | PowerUp <sup>TM</sup> SYBR <sup>TM</sup> Green | (1x)                             | UDG activation for 2 min + Pre-denaturation for 95C for 3 min |                             |            |
|                                      |                               | Primer (F and R)                               | 0.3                              | Denaturation                                                  | 95                          | 15 s       |
|                                      |                               | Probe                                          | NA                               | Annealing                                                     | 60                          | 30 s       |
|                                      |                               | Bovine serum albumen                           | 0.05                             | Extension                                                     | 72                          | 60 s       |

97 **Table S6: qPCR inhibition testing results.** Samples are not inhibited when the difference  
 98 between measured delta(Ct) and expected delta(Ct) (see the right-most column) is less than one.  
 99 Sample dilutions that meet criteria for not being inhibited are shaded green in the right column.

| Assay         | Sample Type    | Expected delta(Ct) |      |      | (MEASURED) CT values based on Dilution Factor (x1, 2, 5, etc.) |       |       | Measured delta(Ct) |      |      | Exp. vs. Meas. |       |       |       |
|---------------|----------------|--------------------|------|------|----------------------------------------------------------------|-------|-------|--------------------|------|------|----------------|-------|-------|-------|
|               |                | 2x                 | 5x   | 10x  | 1x                                                             | 2x    | 5x    | 10x                | 2x   | 5x   | 10x            | 2x    | 5x    | 10x   |
| <i>blaTEM</i> | Tertiary WW    |                    | 1.54 | 2.71 |                                                                | 26.67 | 28.56 | 29.79              |      | 1.89 | 3.12           |       | 0.35  | 0.41  |
|               | RO permeate    |                    | 1.54 | 2.71 |                                                                | 28.32 | 30.25 | 31.36              |      | 1.93 | 3.04           |       | 0.39  | 0.33  |
| <i>sul1</i>   | Tertiary WW    | 1.14               | 2.65 | 3.80 | 22.21                                                          | 23.16 | 25.00 | 26.02              | 0.95 | 2.79 | 3.81           | -0.19 | 0.14  | 0.01  |
|               | RO permeate    | 1.14               | 2.65 | 3.80 | 19.73                                                          | 20.74 | 22.58 | 23.65              | 1.01 | 2.85 | 3.92           | -0.13 | 0.20  | 0.12  |
| 16S           | Tertiary WW    |                    | 1.49 | 2.61 |                                                                | 18.15 | 18.88 | 19.97              |      | 0.73 | 1.82           |       | -0.76 | -0.79 |
|               | RO permeate    | 1.12               | 2.61 | 3.73 | 16.91                                                          | 17.85 | 19.08 | 20.24              | 0.94 | 2.17 | 3.33           | -0.18 | -0.44 | -0.40 |
| Adeno-virus   | Tertiary WW #1 | 1.04               | 1.38 | 2.42 |                                                                | 26.47 |       | 29.44              |      |      | 2.97           |       |       | 0.55  |
|               | Tertiary WW #2 | 1.04               |      |      | 30.85                                                          | 32.12 |       |                    | 1.27 |      |                | 0.23  |       |       |
|               | BAC            | 1.04               | 2.42 | 3.47 |                                                                | 27.29 | 29.18 | 30.42              |      | 1.89 | 3.13           |       | -0.53 | -0.34 |
|               | RO Permeate    | 1.04               | 2.42 | 3.47 |                                                                | 29.08 | 31.23 | 32.19              |      | 2.15 | 3.11           |       | -0.27 | -0.36 |
| Polyoma-virus | Tertiary WW    | 1.10               | 2.54 | 3.64 |                                                                | 29.01 | 30.89 | 31.91              |      | 1.88 | 2.90           |       | -0.66 | -0.74 |
|               | BAC            | 1.10               | 2.54 | 3.64 |                                                                |       |       |                    |      | NA   | NA             |       |       |       |

100  
 101  
 102

103 **Table S7: Summary statistics for results from the five qPCR assays.** For the calculation of  
 104 geometric mean (“geomean”) and geometric standard deviation (“GeoSD”), all samples with  
 105 results below the limit of detection (“LoD”) were set to the LoD. Prevalence is equal to the total  
 106 number of samples detected (“Count: Detects”) divided by the number of total samples (“Count:  
 107 Total”).

| Sampling Location  | qPCR Assay    | Geomean log <sub>10</sub> (GC/mL) | GeoSD | Count: Total (n) | Count: Below LoD | Count: Above LoD | Prevalence (%) |
|--------------------|---------------|-----------------------------------|-------|------------------|------------------|------------------|----------------|
| WW Tertiary        | 16S rRNA gene | 6.35E+05                          | 2.10  | 5                | 0                | 5                | 100            |
| BAC                | 16S rRNA gene | 1.30E+05                          | 1.99  | 5                | 0                | 5                | 100            |
| MF/UF Storage Tank | 16S rRNA gene | 2.09E+03                          | 2.71  | 3                | 0                | 3                | 100            |
| RO                 | 16S rRNA gene | 1.88E+01                          | 3.98  | 10               | 0                | 10               | 100            |
| WW Tertiary        | <i>sul1</i>   | 4.59E+03                          | 4.38  | 5                | 0                | 5                | 100            |
| BAC                | <i>sul1</i>   | 1.33E+03                          | 1.34  | 5                | 0                | 5                | 100            |
| MF/UF Storage Tank | <i>sul1</i>   | 2.52E+02                          | 2.07  | 3                | 0                | 3                | 100            |
| RO                 | <i>sul1</i>   | 1.32E-01                          | 2.50  | 8                | 0                | 8                | 100            |
| WW Tertiary        | <i>blaTEM</i> | 9.74E+01                          | 2.81  | 5                | 0                | 5                | 100            |
| BAC                | <i>blaTEM</i> | 4.10E+00                          | 17.50 | 4                | 0                | 4                | 100            |
| MF/UF Storage Tank | <i>blaTEM</i> | 8.26E-03                          | 1.11  | 3                | 2                | 1                | 33             |
| RO                 | <i>blaTEM</i> | 2.31E-04                          | 2.18  | 7                | 7                | 0                | 0              |
| WW Tertiary        | Adenovirus    | 2.91E+00                          | 1.99  | 4                | 0                | 4                | 100            |
| BAC                | Adenovirus    | 3.05E-02                          | 2.30  | 4                | 0                | 4                | 100            |
| MF/UF Storage Tank | Adenovirus    | 6.56E-03                          | 1.45  | 3                | 3                | 0                | 0              |
| RO                 | Adenovirus    | 3.71E-04                          | 3.17  | 9                | 9                | 0                | 0              |
| WW Tertiary        | Polyomavirus  | 1.25E+02                          | 2.08  | 5                | 0                | 5                | 100            |
| BAC                | Polyomavirus  | 3.05E+00                          | 13.40 | 5                | 1                | 4                | 80             |
| MF/UF Storage Tank | Polyomavirus  | 8.26E-03                          | 1.11  | 3                | 3                | 0                | 0              |
| RO                 | Polyomavirus  | 4.32E-04                          | 4.00  | 7                | 7                | 0                | 0              |

108  
109



110 **Table S8: Summary statistics for total and intact cell count measurements across the**  
 111 **advanced treatment train.** For the calculation of geometric mean (“Geomean) and geometric  
 112 standard deviation (“GeoSD”), all samples with cell counts below the limit of quantification  
 113 (“LoQ”) were set to the LoQ. Combined results for parallel processes (e.g., “MF/UF” = averaged  
 114 results for MF and UF) are depicted in the table by grey shading.

| Sampling Location    | Flow Cytometry Assay | Geomean $\log_{10}$ (cells/mL) | GeoSD | Count (n) | Count (n) less than LoQ | % Less than LoQ |
|----------------------|----------------------|--------------------------------|-------|-----------|-------------------------|-----------------|
| WW Tertiary          | Total Cell Count     | 6.63E+06                       | 1.40  | 7         | 0                       | 0               |
| WW Tertiary          | Intact Cell Count    | 4.77E+06                       | 1.42  | 7         | 0                       | 0               |
| Ozone                | Total Cell Count     | 4.31E+04                       | 2.93  | 7         | 0                       | 0               |
| Ozone                | Intact Cell Count    | 2.89E+04                       | 3.06  | 7         | 0                       | 0               |
| BAC                  | Total Cell Count     | 6.28E+05                       | 1.23  | 7         | 0                       | 0               |
| BAC                  | Intact Cell Count    | 5.57E+05                       | 1.20  | 7         | 0                       | 0               |
| MF                   | Total Cell Count     | 1.55E+04                       | 1.47  | 7         | 0                       | 0               |
| MF                   | Intact Cell Count    | 1.37E+04                       | 1.40  | 7         | 0                       | 0               |
| UF                   | Total Cell Count     | 7.23E+04                       | 2.79  | 7         | 0                       | 0               |
| UF                   | Intact Cell Count    | 4.48E+04                       | 1.98  | 7         | 0                       | 0               |
| MF/UF                | Total Cell Count     | 3.90E+04                       | 3.08  | 14        | 0                       | 0               |
| MF/UF                | Intact Cell Count    | 2.65E+04                       | 2.26  | 14        | 0                       | 0               |
| MF/UF Storage Tank   | Total Cell Count     | 4.95E+04                       | 1.45  | 7         | 0                       | 0               |
| MF/UF Storage Tank   | Intact Cell Count    | 4.30E+04                       | 1.37  | 7         | 0                       | 0               |
| RO (2-stage)         | Total Cell Count     | 3.52E+02                       | 3.35  | 7         | 0                       | 0               |
| RO (2-stage)         | Intact Cell Count    | 2.06E+02                       | 3.27  | 7         | 0                       | 0               |
| RO (3-stage)         | Total Cell Count     | 3.55E+02                       | 3.67  | 7         | 0                       | 0               |
| RO (3-stage)         | Intact Cell Count    | 2.01E+02                       | 3.68  | 7         | 0                       | 0               |
| RO                   | Total Cell Count     | 3.53E+02                       | 3.32  | 14        | 0                       | 0               |
| RO                   | Intact Cell Count    | 2.04E+02                       | 3.28  | 14        | 0                       | 0               |
| RO Combined Permeate | Total Cell Count     | 5.45E+02                       | 2.67  | 7         | 0                       | 0               |
| RO Combined Permeate | Intact Cell Count    | 3.04E+02                       | 2.92  | 7         | 0                       | 0               |
| AOP                  | Total Cell Count     | 1.61E+02                       | 2.40  | 6         | 0                       | 0               |
| AOP                  | Intact Cell Count    | 2.95E+01                       | 1.32  | 6         | 2                       | 33              |

115  
 116  
 117

118 **Table S9: Summary statistics for total and intracellular ATP measurements across the**  
 119 **advanced treatment train.** For the calculation of geometric mean (“Geomean”) and geometric  
 120 standard deviation (“GeoSD”), all samples with cell counts below the limit of quantification  
 121 (“LoQ”) were set to the LoQ. Combined results for parallel processes (e.g., “MF/UF” = averaged  
 122 results for MF and UF) are depicted in the table by grey shading.

| Sampling Location    | ATP Assay         | Geomean<br>log <sub>10</sub> (nM) | GeoSD | Count<br>(n) | Count (n)<br>less than<br>LoQ | % Less<br>than LoQ |
|----------------------|-------------------|-----------------------------------|-------|--------------|-------------------------------|--------------------|
| WW Tertiary          | Total ATP         | 6.81E-01                          | 1.34  | 5            | 0                             | 0                  |
| WW Tertiary          | Intracellular ATP | 3.92E-01                          | 1.53  | 5            | 0                             | 0                  |
| Ozone                | Total ATP         | 1.04E-01                          | 3.52  | 6            | 0                             | 0                  |
| Ozone                | Intracellular ATP | 2.54E-03                          | 3.43  | 6            | 0                             | 0                  |
| BAC                  | Total ATP         | 9.51E-02                          | 1.39  | 6            | 0                             | 0                  |
| BAC                  | Intracellular ATP | 6.98E-02                          | 1.51  | 6            | 0                             | 0                  |
| MF                   | Total ATP         | 3.28E-03                          | 2.33  | 5            | 0                             | 0                  |
| MF                   | Intracellular ATP | 8.61E-04                          | 2.95  | 4            | 0                             | 0                  |
| UF                   | Total ATP         | 5.90E-03                          | 1.76  | 5            | 0                             | 0                  |
| UF                   | Intracellular ATP | 3.24E-03                          | 2.08  | 5            | 0                             | 0                  |
| MF/UF                | Total ATP         | -2.36E+00                         | 2.11  | 10           | 0                             | 0                  |
| MF/UF                | Intracellular ATP | -2.75E+00                         | 2.98  | 9            | 0                             | 0                  |
| MF/UF Storage Tank   | Total ATP         | 2.38E+00                          | 2.38  | 5            | 0                             | 0                  |
| MF/UF Storage Tank   | Intracellular ATP | 2.06E+00                          | 2.06  | 5            | 0                             | 0                  |
| RO (2-stage)         | Total ATP         | 1.23E+00                          | 1.23  | 7            | 0                             | 0                  |
| RO (2-stage)         | Intracellular ATP | 1.84E+00                          | 1.84  | 3            | 0                             | 0                  |
| RO (3-stage)         | Total ATP         | 1.63E+00                          | 1.63  | 6            | 1                             | 17                 |
| RO (3-stage)         | Intracellular ATP | 3.00E+00                          | 3.01  | 3            | 1                             | 33                 |
| RO                   | Total ATP         | -3.81E+00                         | 1.42  | 13           | 1                             | 8                  |
| RO                   | Intracellular ATP | -4.12E+00                         | 2.25  | 6            | 1                             | 17                 |
| RO Combined Permeate | Total ATP         | -3.51E+00                         | 1.90  | 5            | 0                             | 0                  |
| RO Combined Permeate | Intracellular ATP | -3.89E+00                         | 2.11  | 5            | 0                             | 0                  |
| AOP                  | Total ATP         | -4.00E+00                         | 1.00  | 5            | 5                             | 100                |
| AOP                  | Intracellular ATP | NA                                | NA    | NA           | NA                            | NA                 |

123

124 **Table S10:** Log removal values (LRV) for total and intact cell counts by flow cytometry across  
 125 major treatment processes at the advanced treatment facility. Combined results for parallel  
 126 processes (e.g., “MF/UF” = averaged results for MF and UF) are depicted in the table by grey  
 127 shading.

| Sampling Location    | Total Cell Counts |              |       | Intact Cell Counts |              |       |
|----------------------|-------------------|--------------|-------|--------------------|--------------|-------|
|                      | Average LRV       | St. Dev. LRV | Count | Average LRV        | St. Dev. LRV | Count |
| WW Tertiary          | 0                 | 0            | NA    | 0                  | 0            | NA    |
| Ozone                | 2.23              | 0.41         | 5     | 2.24               | 0.44         | 5     |
| BAC                  | -1.16             | 0.38         | 6     | -1.28              | 0.42         | 6     |
| MF                   | 1.61              | 0.21         | 4     | 1.61               | 0.19         | 4     |
| UF                   | 0.94              | 0.40         | 6     | 1.09               | 0.28         | 5     |
| MF/UF                | 1.21              | 0.48         | 10    | 1.32               | 0.36         | 9     |
| MF/UF Storage Tank   | -0.19             | 0.39         | 5     | -0.12              | 0.22         | 5     |
| RO (2-stage)         | 2.30              | 0.81         | 6     | 2.24               | 0.64         | 5     |
| RO (3-stage)         | 2.26              | 0.80         | 5     | 2.17               | 0.65         | 4     |
| RO                   | 2.28              | 0.76         | 11    | 2.21               | 0.60         | 9     |
| RO Combined Permeate | 0.04              | 0.63         | 4     | 0.07               | 0.55         | 4     |
| AOP                  | 0.39              | 0.13         | 5     | 0.86               | 0.43         | 5     |

128

129 **Table S11:** Log removal values (LRV) for total and intracellular ATP across major treatment  
 130 processes at the advanced treatment facility. Combined results for parallel processes (e.g.,  
 131 “MF/UF” = averaged results for MF and UF) are depicted in the table by grey shading.

| Sampling Location    | Total ATP   |              |       | Intracellular ATP |              |       |
|----------------------|-------------|--------------|-------|-------------------|--------------|-------|
|                      | Average LRV | St. Dev. LRV | Count | Average LRV       | St. Dev. LRV | Count |
| WW Tertiary          | 0           | 0            | NA    | 0                 | 0            | NA    |
| Ozone                | 0.73        | 0.48         | 5     | 2.20              | 0.70         | 5     |
| BAC                  | 0.04        | 0.55         | 6     | -1.44             | 0.61         | 6     |
| MF                   | 1.46        | 0.27         | 7     | 1.92              | 0.30         | 7     |
| UF                   | 1.20        | 0.30         | 7     | 1.32              | 0.42         | 7     |
| MF/UF                | 1.33        | 0.30         | 10    | 1.59              | 0.47         | 9     |
| MF/UF Tank           | -0.34       | 0.33         | 5     | -0.36             | 0.39         | 5     |
| RO (2-stage)         | 1.87        | 0.35         | 7     | 1.75              | 0.14         | 7     |
| RO (3-stage)         | 1.77        | 0.66         | 7     | 1.89              | 0.87         | 7     |
| RO                   | 1.82        | 0.48         | 9     | 1.82              | 0.51         | 4     |
| RO Combined Permeate | -0.29       | 0.30         | 6     | -0.43             | 0.11         | 3     |
| AOP                  | 0.44        | 0.18         | 4     | NA                | NA           | NA    |

132  
 133  
 134

135 **Table S12. Recovery of total cell count through bulk water primary concentration**  
 136 **(ultrafiltration).** Results from other studies<sup>1-3</sup> utilizing REXEED 25S filters and similar  
 137 ultrafiltration methods are shown as points of comparison. These other studies from literature are  
 138 not directly comparable but are the only studies we found that quantified recovery using  
 139 ultrafiltration methods.

| Study                 | Water Type                    | Microbial Target<br>(and if Seeded)       | Microbial<br>Quantification<br>Method | Type of<br>Ultrafiltration | Filter<br>Blocking? | Backflushing<br>Solution   | Water Vol.<br>Collected (L) | Turbidity -<br>Average<br>(NTU) | Sample<br>Count<br>(n) | Microbial Recovery by<br>Primary Concentration |              |       |
|-----------------------|-------------------------------|-------------------------------------------|---------------------------------------|----------------------------|---------------------|----------------------------|-----------------------------|---------------------------------|------------------------|------------------------------------------------|--------------|-------|
|                       |                               |                                           |                                       |                            |                     |                            |                             |                                 |                        | Range                                          | Geo-<br>mean | GeoSD |
| This Study            | Tertiary Wastewater           | Total cell count                          | Flow cytometry                        | Dead-end                   | Yes                 | Refer to methods           | 30 - 121                    | NA                              | 3                      | 37 - 100                                       | 71.4         | 1.78  |
| This Study            | BAC Effluent                  | Total cell count                          | Flow cytometry                        | Dead-end                   | Yes                 | Refer to methods           | 34 - 336                    | 0.171                           | 4                      | 55 - 253                                       | 104          | 1.96  |
| This Study            | MF/UF Storage Tank            | Total cell count                          | Flow cytometry                        | Dead-end                   | Yes                 | Refer to methods           | 342 - 577                   | 0.03                            | 2                      | 28 - 259                                       | 85.3         | 4.8   |
| This Study            | RO Permeate                   | Total cell count                          | Flow cytometry                        | Dead-end                   | Yes                 | Refer to methods           | 1,290 - 3,891               | NA                              | 10                     | 1.5 - 102                                      | 14.5         | 3.69  |
|                       |                               |                                           |                                       |                            |                     |                            |                             |                                 |                        | <b>Avg</b>                                     | <b>StDev</b> |       |
| Smith et al.<br>2009  | Tap ("low<br>turbidity")      | <i>Enterococcus<br/>faecalis (seeded)</i> | mEI agar culture;<br>EPA 1600         | Dead-end                   | No                  | Tap water                  | 100                         | 0.29                            | 4                      |                                                | 93           | 16    |
| Smith et al.<br>2009  | Tap ("mid<br>turbidity")      | <i>Enterococcus<br/>faecalis (seeded)</i> | mEI agar culture;<br>EPA 1600         | Dead-end                   | No                  | Tap water                  | 100                         | 1.5                             | 5                      |                                                | 71           | 11    |
| Smith et al.<br>2009  | Tap ("high<br>turbidity")     | <i>Enterococcus<br/>faecalis (seeded)</i> | mEI agar culture;<br>EPA 1600         | Dead-end                   | No                  | Tap water                  | 100                         | 4.3                             | 6                      |                                                | 78           | 12    |
| Mull et al.<br>2012   | Surface ("low<br>turbidity")  | Enterococci                               | mEI agar culture;<br>EPA 1600         | Dead-end                   | No                  | Same solution as<br>herein | 100                         | 16                              | 3                      |                                                | 85           | 7     |
| Mull et al.<br>2012   | Surface ("mid<br>turbidity")  | Enterococci                               | mEI agar culture;<br>EPA 1600         | Dead-end                   | No                  | Same solution as<br>herein | 100                         | 46                              | 4                      |                                                | 73           | 11    |
| Mull et al.<br>2012   | Surface ("high<br>turbidity") | Enterococci                               | mEI agar culture;<br>EPA 1600         | Dead-end                   | No                  | Same solution as<br>herein | 100                         | 92                              | 4                      |                                                | 86           | 7     |
| Mull et al.<br>2012   | Surface ("low<br>turbidity")  | <i>Escherichia coli</i>                   | mTEC agar culture;<br>EPA 1603        | Dead-end                   | No                  | Same solution as<br>herein | 100                         | 16                              | 3                      |                                                | 85           | 7     |
| Mull et al.<br>2012   | Surface ("mid<br>turbidity")  | <i>Escherichia coli</i>                   | mTEC agar culture;<br>EPA 1603        | Dead-end                   | No                  | Same solution as<br>herein | 100                         | 46                              | 4                      |                                                | 73           | 11    |
| Mull et al.<br>2012   | Surface ("high<br>turbidity") | <i>Escherichia coli</i>                   | mTEC agar culture;<br>EPA 1603        | Dead-end                   | No                  | Same solution as<br>herein | 100                         | 92                              | 4                      |                                                | 87           | 7     |
| Kahler et al.<br>2015 | River<br>(Chattahoochee)      | <i>Escherichia coli</i>                   | Methods 9222D<br>and 9222G            | Tangential-flow            | Yes                 | Same solution as<br>herein | 50                          | 5 - 128                         | 4                      |                                                | 98           | 11    |
| Kahler et al.<br>2015 | Lake (Murphy<br>Chandler)     | <i>Escherichia coli</i>                   | Methods 9222D<br>and 9222G            | Tangential-flow            | Yes                 | Same solution as<br>herein | 50                          | 4 - 12                          | 5                      |                                                | 85           | 38    |
| Kahler et al.<br>2015 | Lake (Allatoona)              | <i>Escherichia coli</i>                   | Methods 9222D<br>and 9222G            | Tangential-flow            | Yes                 | Same solution as<br>herein | 50                          | 4 - 5                           | 3                      |                                                | 79           | 12    |
| Kahler et al.<br>2015 | Ground (Jefferson<br>City)    | <i>Escherichia coli</i>                   | Methods 9222D<br>and 9222G            | Tangential-flow            | Yes                 | Same solution as<br>herein | 50                          | 2                               | 4                      |                                                | 87           | 16    |

140  
141

142  
143

### 3. Supplementary Figures

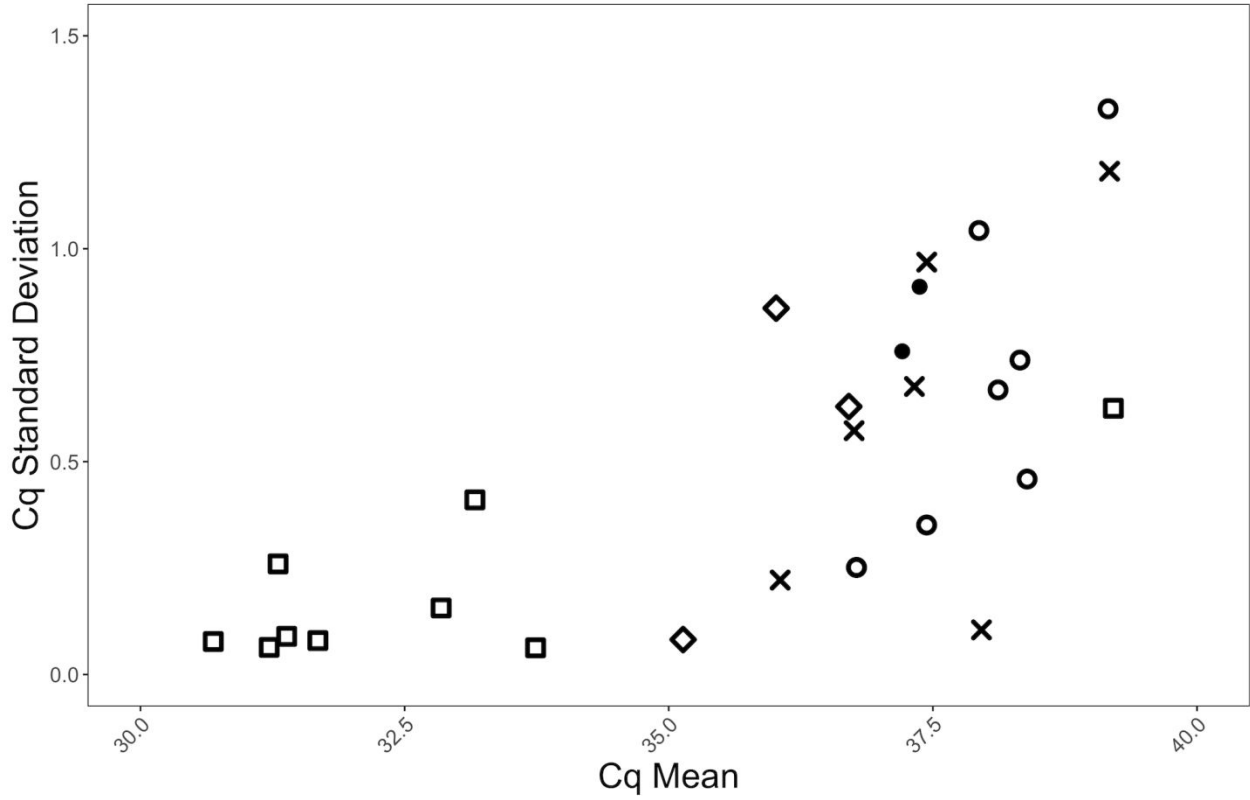

144  
145  
146  
147

qPCR Assay  $\square$  16S rRNA Gene  $\diamond$  Adenovirus  $\circ$  Blatem  $\bullet$  Polyomavirus  $\times$  Sul1  
**Figure S1. Cq Mean versus standard deviation for standard curve replicates at the respective standard curve LoD (i.e., 1000 gene copies per well for the 16S rRNA gene, and 10 gene copies per well for all other qPCR assays).**

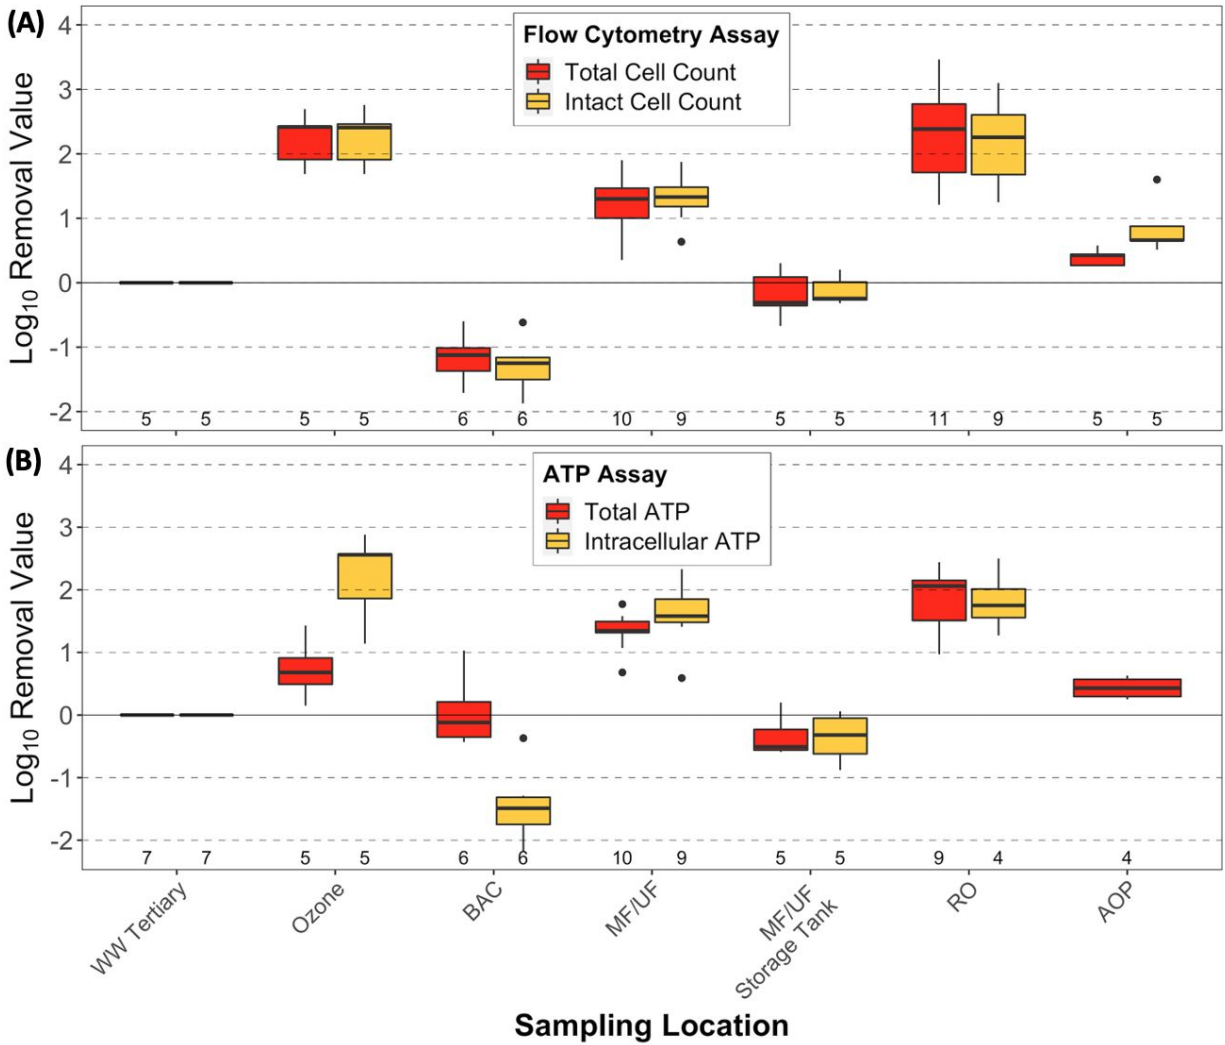

148  
 149 **Figure S2. Boxplots of log<sub>10</sub> reduction values for (A) total and intact cell counts and (B)**  
 150 **total and intracellular ATP throughout the advanced treatment train.** Data shown for BAC,  
 151 MF/UF, and RO are combined measurements from the respective parallel treatment process  
 152 effluents. The total number of samples taken (n) at each location is located immediately above  
 153 the x-axis. All samples were analyzed in technical triplicate. Log reduction values were  
 154 calculated by comparing the microbial abundance in the influent and effluent of each unit  
 155 process. Intracellular ATP was not below the detection limit for AOP and is not shown here.

156

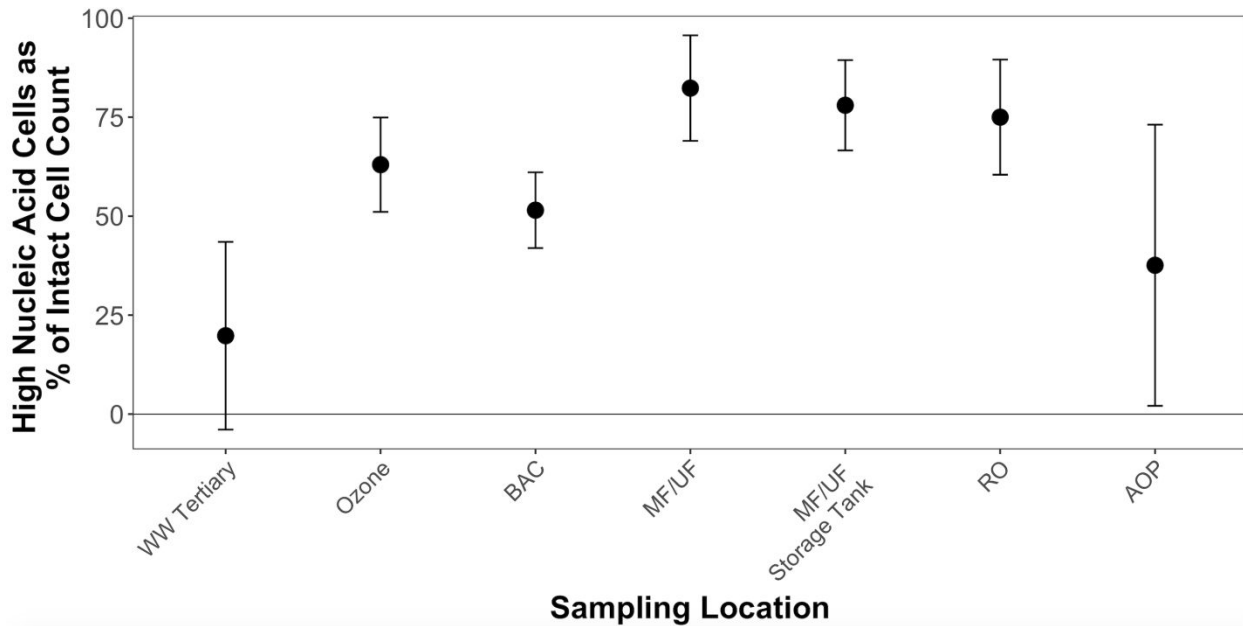

157

158

159

160

161

162

**Figure S3. Proportion of intact cell counts that were high nucleic acid bacteria throughout the advanced treatment train.** All samples were analyzed in technical triplicates. Error bars represent standard deviation of the average proportion.

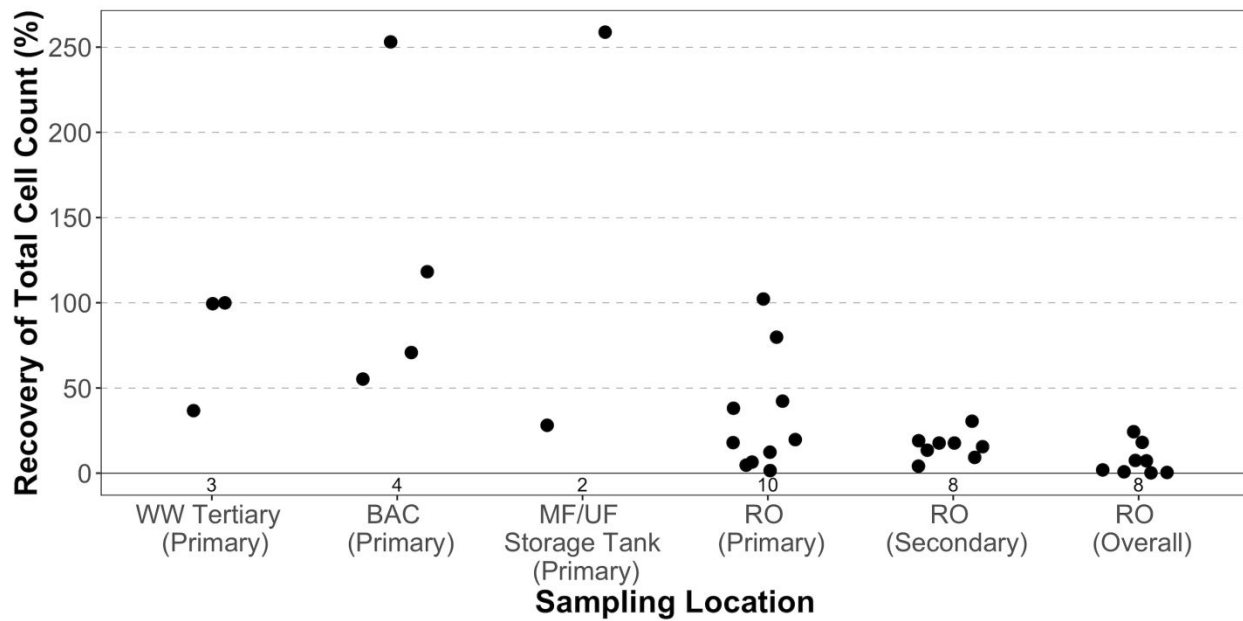

163

164

165

166

167

168

169

170

**Figure S4: Recovery efficiencies of total cells through primary (“primary”; dead-end ultrafiltration) and secondary concentration (“secondary”; polyethylene glycol flocculation and centrifugation) at sampling locations for which dead-end ultrafiltration was used to concentrate bulk water.** Overall recovery was calculated by multiplying primary and secondary concentration efficiencies for respective samples. Secondary recovery was not assessed for tertiary wastewater, BAC, or MF/UF storage tank samples. The total number of samples taken (n) for each type of recovery measurement or calculation is located above the x-axis.



171  
172

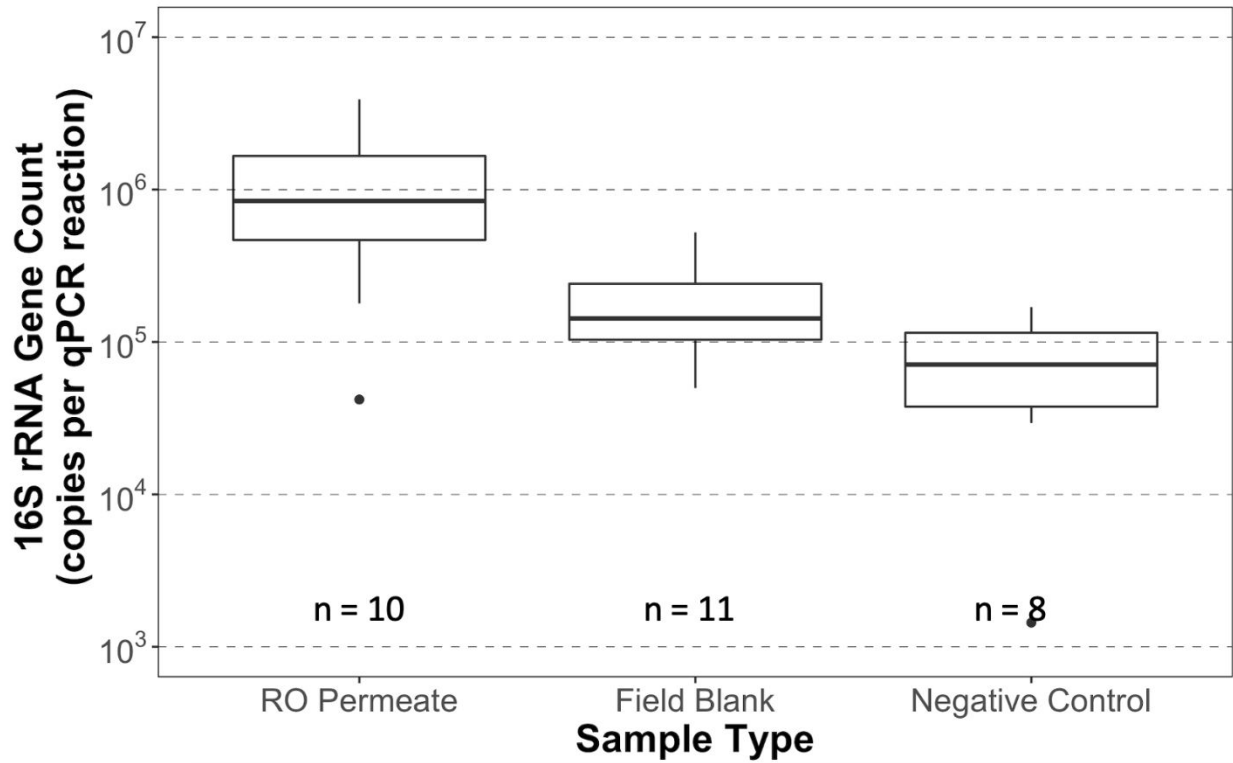

173  
174  
175  
176  
177

**Figure S5:** Quantities of the 16S rRNA gene in qPCR reaction wells for RO permeate, dead-end ultrafiltration field blank, and qPCR negative controls (i.e., PCR-grade water). The total number of samples taken (n) at each sampling location is located above the x-axis.

178  
 179  
 180  
 181

#### 4. Author Contributions

Table of Author Contributions

|                            | UC Berkeley      |                  |                    |                 |               |                       | Trussell Technologies |            |
|----------------------------|------------------|------------------|--------------------|-----------------|---------------|-----------------------|-----------------------|------------|
|                            | Dr. Scott Miller | Hannah Greenwald | Dr. Lauren Kennedy | Dr. Rose Kantor | Renjing Jiang | Professor Kara Nelson | Dr. Aleks Pisarenko   | Elise Chen |
| Conceptualization          | X                | X                | X                  | X               |               | X                     | X                     | X          |
| Methodology                | X                | X                | X                  | X               | X             | X                     |                       |            |
| Software                   |                  |                  | X                  | X               |               |                       |                       |            |
| Validation                 |                  | X                |                    |                 |               |                       |                       |            |
| Formal Analysis            | X                |                  |                    |                 |               |                       |                       |            |
| Investigation              | X                | X                |                    |                 | X             |                       | X                     | X          |
| Resources                  |                  |                  |                    |                 |               | X                     | X                     | X          |
| Data Curation              | X                | X                | X                  | X               |               |                       |                       |            |
| Writing - Original Draft   | X                |                  |                    |                 |               |                       |                       |            |
| Writing - Review & Editing |                  | X                | X                  | X               |               | X                     | X                     |            |
| Visualization              | X                |                  | X                  | X               |               |                       |                       |            |
| Supervision                |                  |                  |                    | X               |               | X                     |                       |            |
| Project Administration     | X                |                  |                    |                 |               | X                     | X                     | X          |
| Funding Acquisition        |                  |                  |                    |                 |               | X                     |                       |            |

182

183 **5. References**

- 184 1. Smith CM, Hill VR. Dead-End Hollow-Fiber Ultrafiltration for Recovery of Diverse  
185 Microbes from Water. *Appl Environ Microbiol.* 2009;75(16):5284-5289.  
186 doi:10.1128/AEM.00456-09.
- 187 2. Mull B, Hill VR. Recovery of diverse microbes in high turbidity surface water samples  
188 using dead-end ultrafiltration. *J Micro Methods.* 2012;91(3):429-433.  
189 doi:10.1016/j.mimet.2012.10.001.
- 190 3. Kahler A, Johnson T, Hahn D, Narayanan J, Derado G, Hill V. Evaluation of an  
191 Ultrafiltration-Based Procedure for Simultaneous Recovery of Diverse Microbes in Source  
192 Waters. *Water.* 2015;7(12):1202-1216. doi:10.3390/w7031202.

193
